# Supplementary material for: Spatio-temporal evolution of glacial lakes in the Tibetan Plateau over the past 30 years
Source: Copernicus journal article supplement (doi:10.5194/egusphere-2022-586), 2022-09-19
Supplement: Supplementary file 1 [file egusphere-2022-586-supplement.pdf]

*Supplement of*

**Spatio-temporal evolution of glacial lakes in the Tibetan Plateau over the past 30 years**

**Xiangyang Dou et al.**

5 *Correspondence to:* Xuanmei Fan (fxm\_cdut@qq.com)

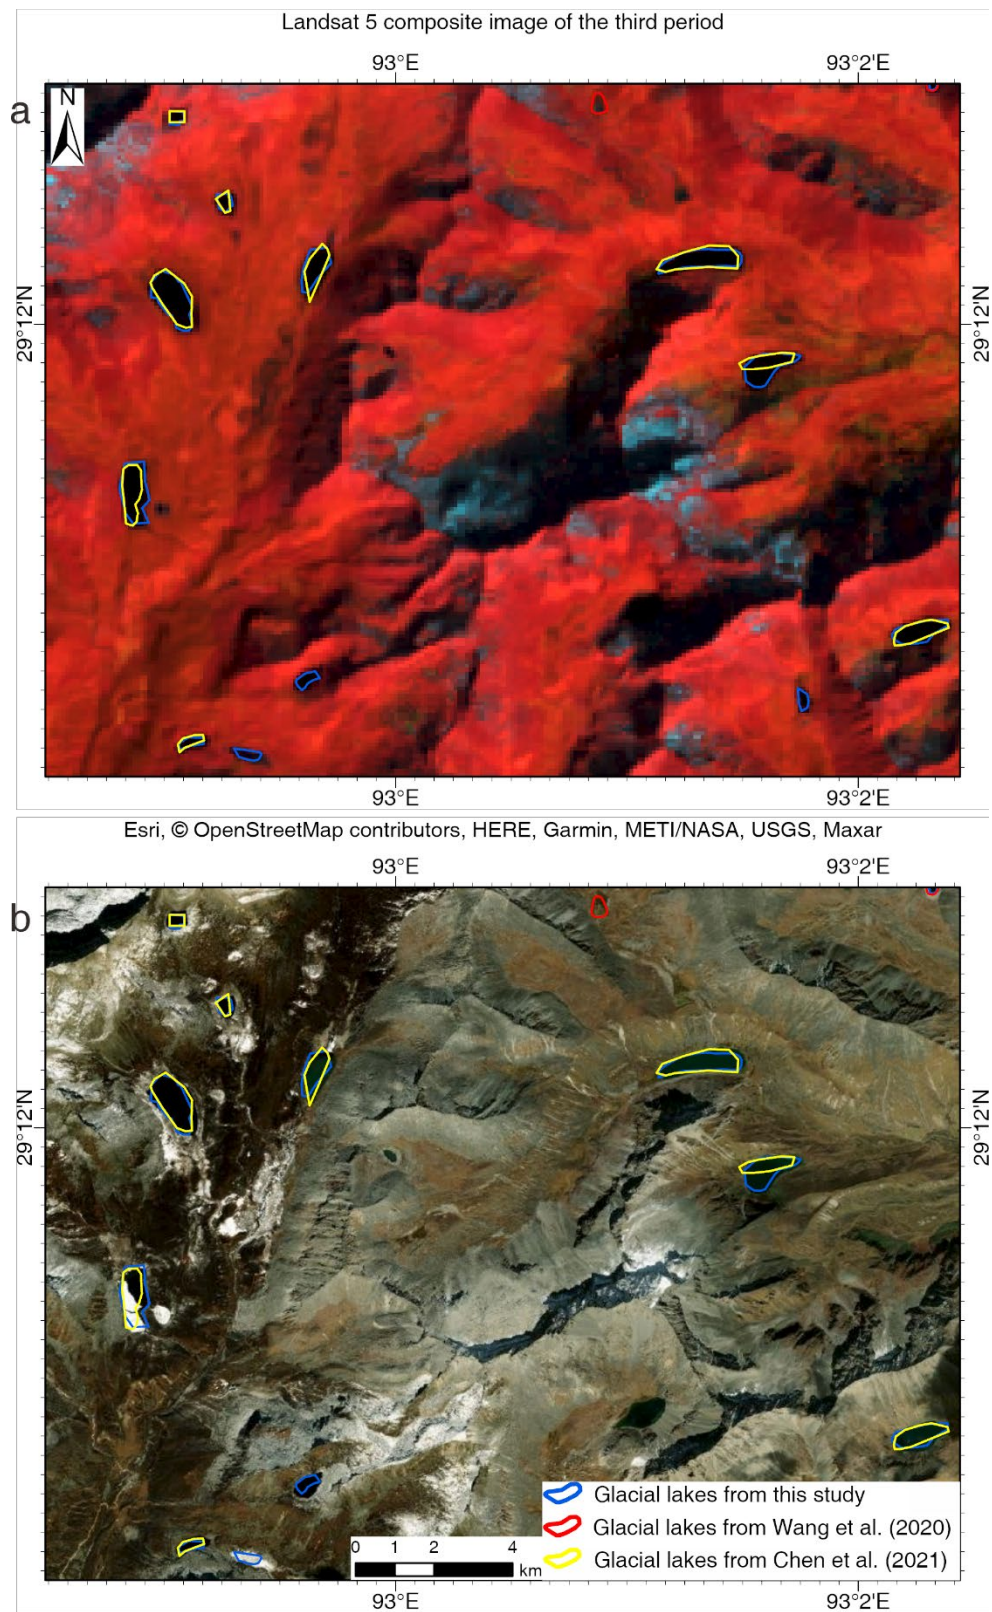

**Figure S1.** The glacial lake boundaries from these three inventories for randomly selected region #1. The base maps are sourced from (a) Landsat 5 composite imagery and (b) ESRI online maps. The blue polygons from 1990-1999 period of this study; red polygons from 1990 of Wang et al. (2020); yellow polygons from 2008 of Chen et al. (2021).



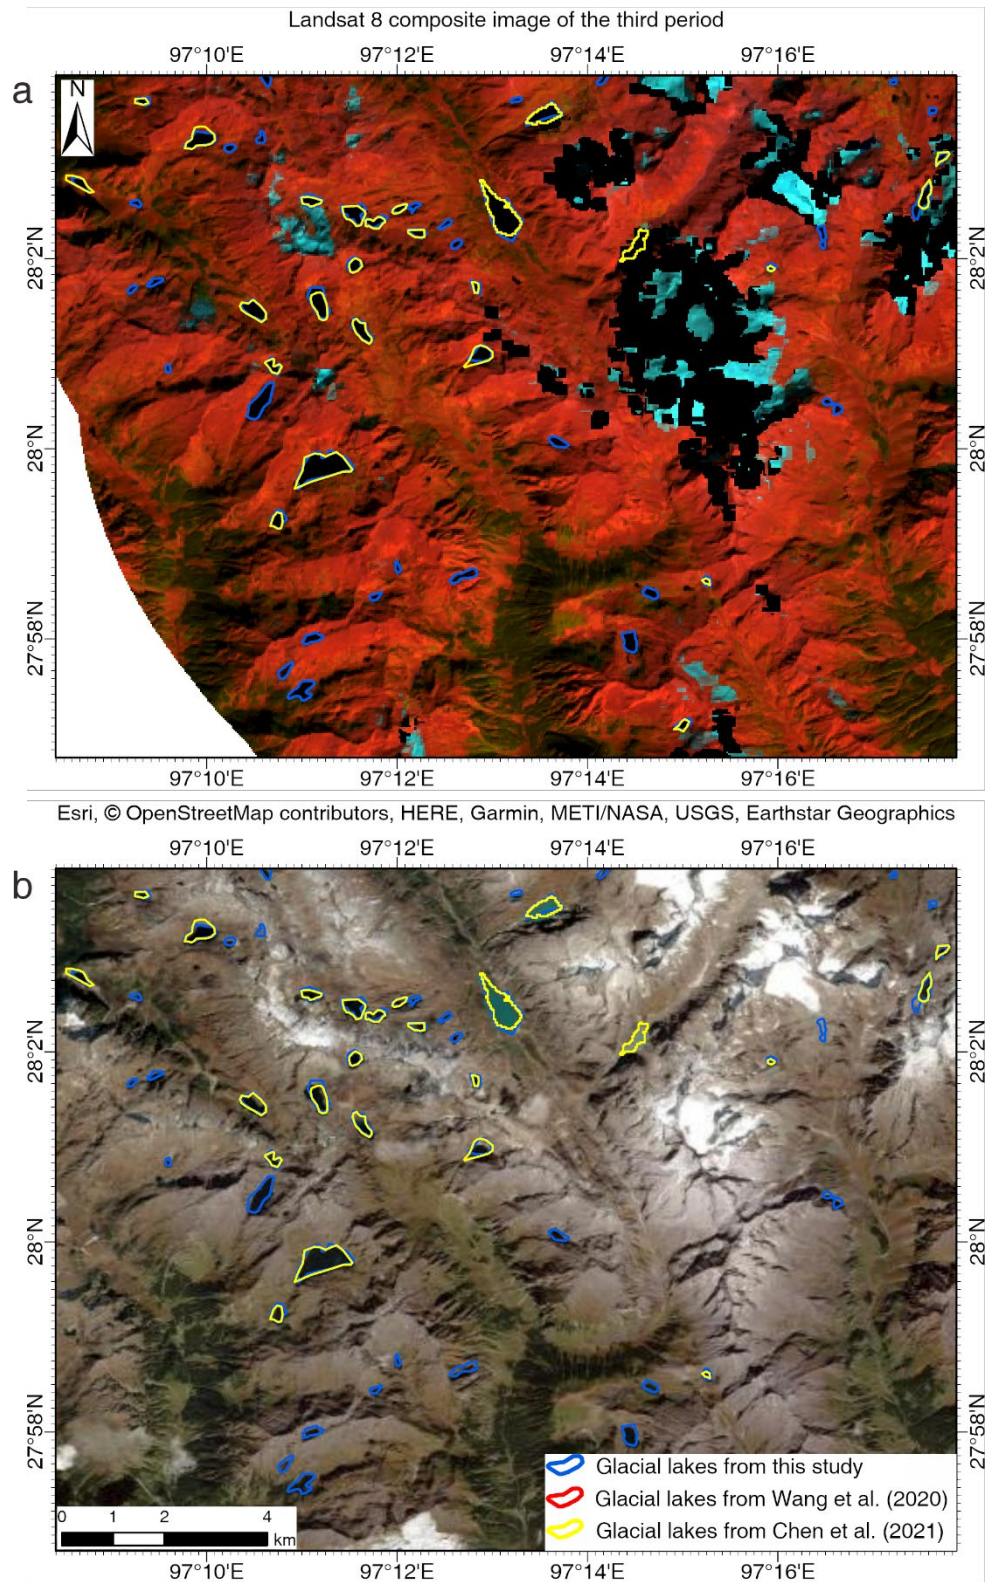

**Figure S2.** The glacial lake boundaries from these three inventories for randomly selected region #2. The base maps are sourced from (a) Landsat 8 composite imagery and (b) ESRI online maps. The blue polygons from 2013-2019 period of this study; red polygons from 2018 of Wang et al. (2020); yellow polygons from 2017 of



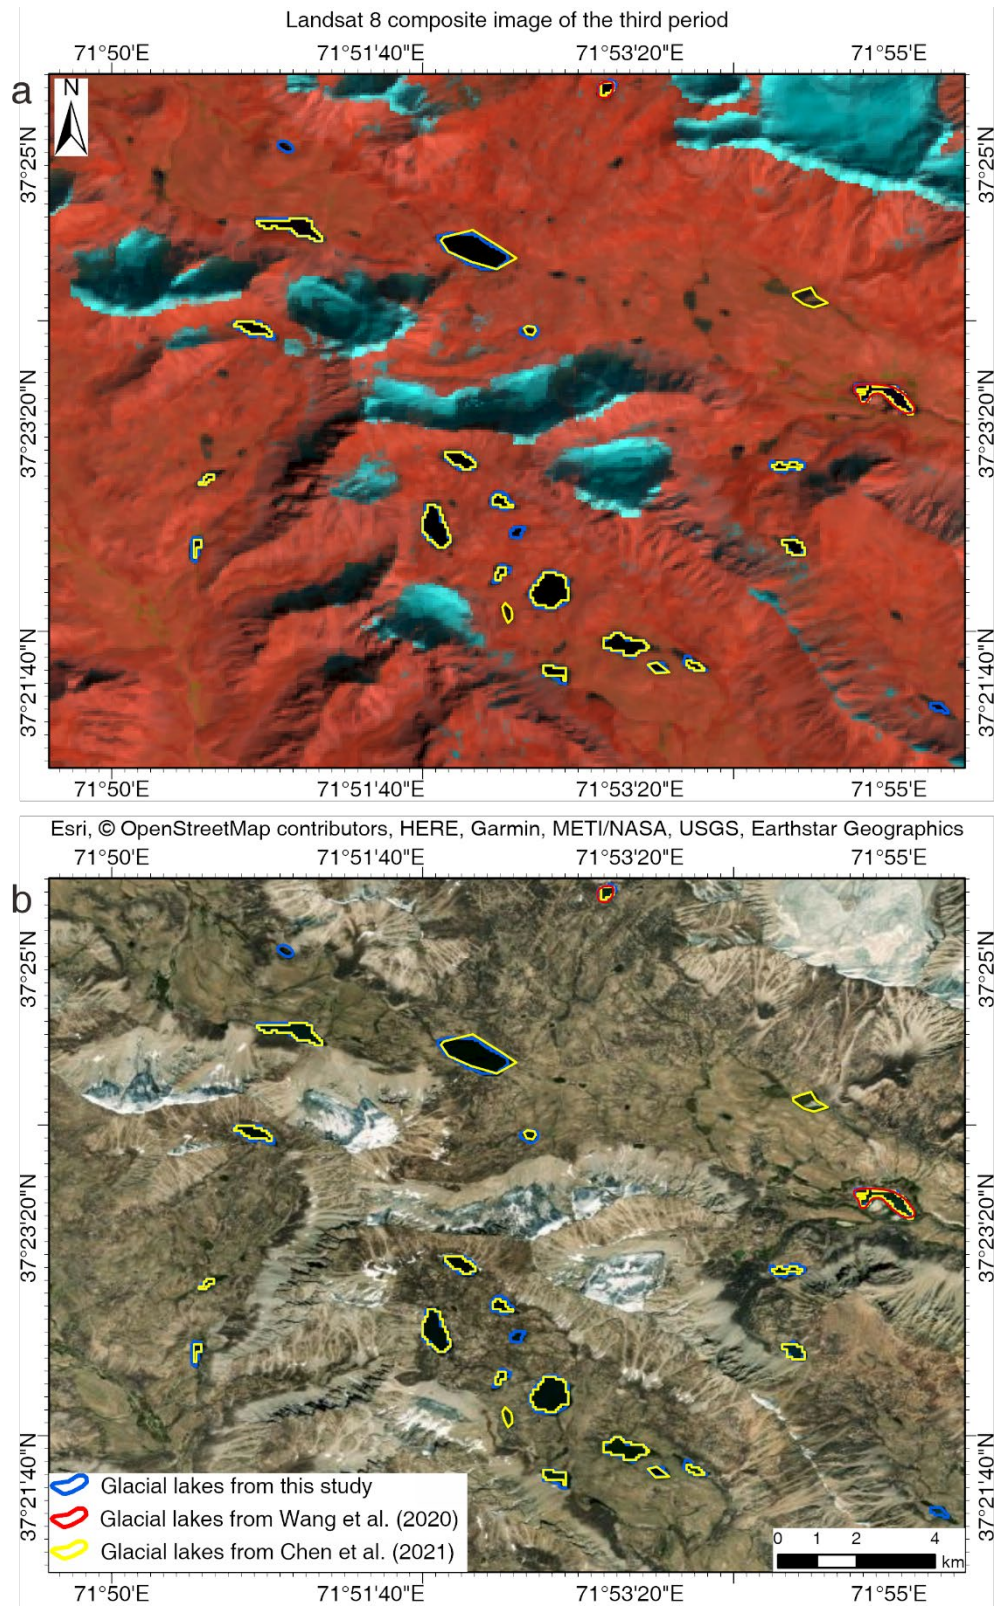

**Figure S3.** The glacial lake boundaries from these three inventories for randomly selected region #3. The base maps are sourced from (a) Landsat 8 composite imagery and (b) ESRI online maps. The blue polygons from 2013-2019 period of this study; red polygons from 2018 of Wang et al. (2020); yellow polygons from 2017 of Chen et al. (2021).

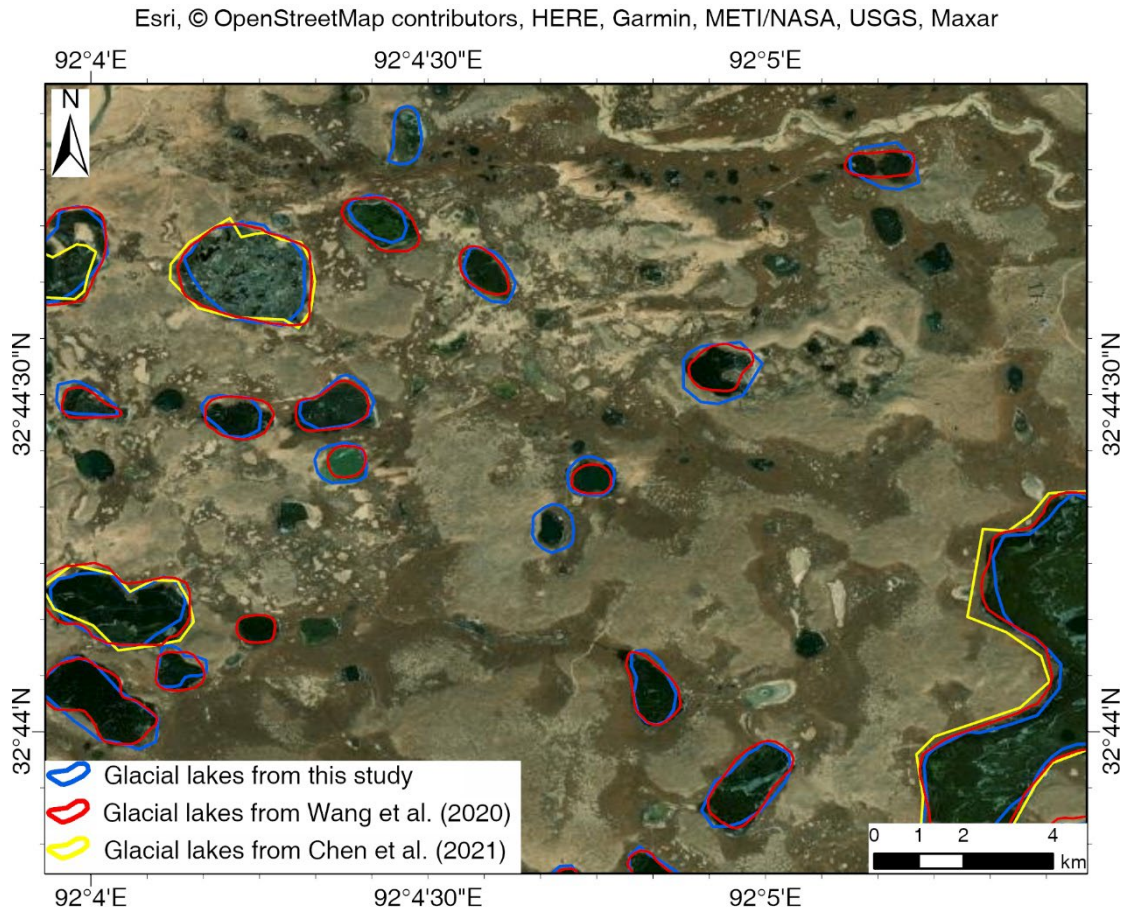

**Figure S4.** The glacial lake boundaries from these three inventories for randomly selected region #4. The base map is sourced from ESRI online maps. The blue polygons from 2013-2019 period of this study; red polygons from 2018 of Wang et al. (2020); yellow polygons from 2017 of Chen et al. (2021).



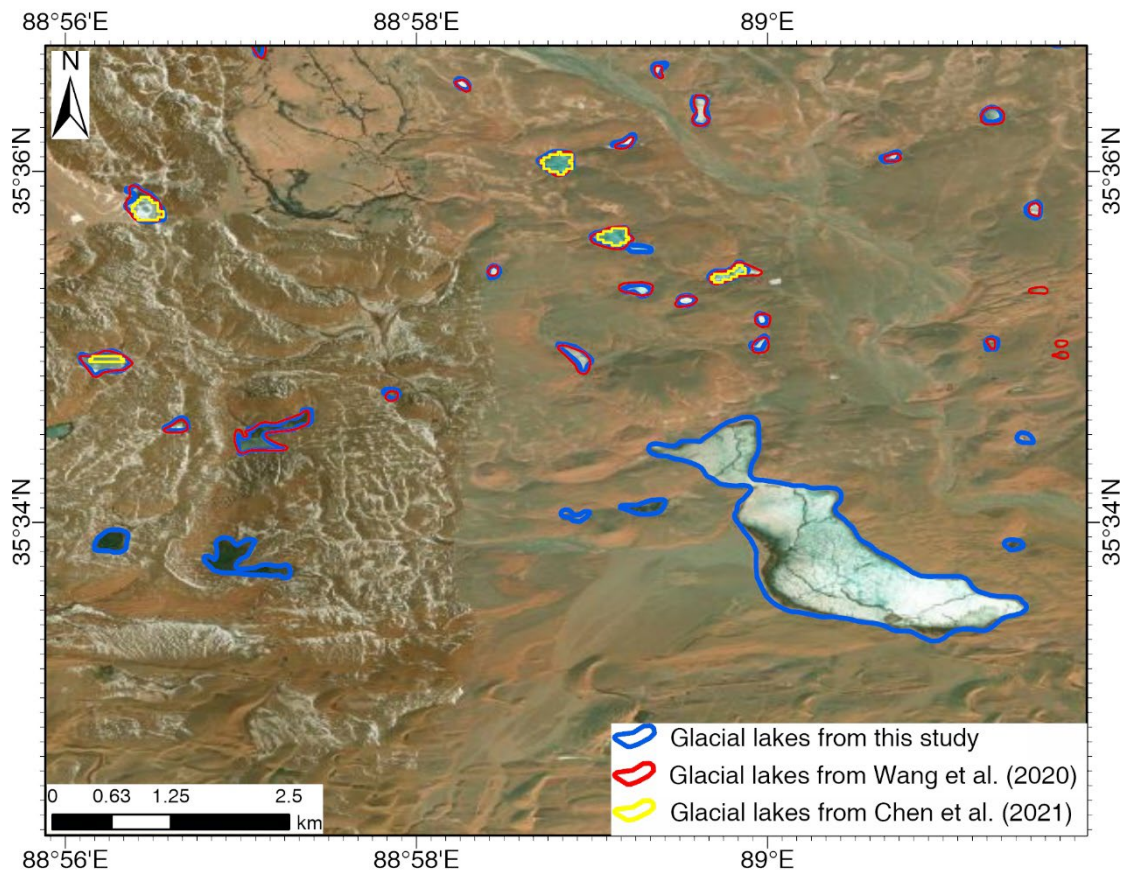

**Figure S5.** The glacial lake boundaries from these three inventories for randomly selected region #5. The base map is sourced from ESRI online maps. The blue polygons from 2013-2019 period of this study; red polygons from 2018 of Wang et al. (2020); yellow polygons from 2017 of Chen et al. (2021).

30 **Reference**

Chen, F., Zhang, M., Guo, H., Allen, S., Kargel, J. S., Haritashya, U. K., and Watson, C. S.: Annual 30 m dataset for glacial lakes in High Mountain Asia from 2008 to 2017, *Earth Syst Sci Data*, 13, 741-766, <https://doi.org/10.5194/essd-13-741-2021>, 2021.

35 Wang, X., Guo, X. Y., Yang, C. D., Liu, Q. H., Wei, J. F., Zhang, Y., Liu, S. Y., Zhang, Y. L., Jiang, Z. L., and Tang, Z. G.: Glacial lake inventory of high-mountain Asia in 1990 and 2018 derived from Landsat images, *Earth Syst Sci Data*, 12, 2169-2182, <https://doi.org/10.5194/essd-12-2169-2020>, 2020.
